# Supplementary material for: A stable, efficient textile-based flexible perovskite solar cell with improved washable and deployable capabilities for wearable device applications
Source: Royal Society of Chemistry journal article supplement (doi:10.1039/c7ra10321b), 2017-01-01
Supplement: c7ra10321b1.pdf [file c7ra10321b1.pdf]

## Supporting Information

### A Stable, Efficient Textile-based Flexible Perovskite Solar Cell with Improved Washable and Deployable Capabilities for Wearable Device Applications

*Jeun-Yan Lam,<sup>a</sup> Jung-Yao Chen,<sup>b</sup> Ping-Chun Tsai,<sup>a</sup> Yun-Ting Hsieh,<sup>b</sup> Chu-Chen Chueh,<sup>b,\*</sup> Shih-Huang Tung,<sup>a,\*</sup> and Wen-Chang Chen<sup>a,b,\*</sup>*

<sup>a</sup> Institute of Polymer Science and Engineering, National Taiwan University, Taipei 10617, Taiwan.

E-mail: [shtung@ntu.edu.tw](mailto:shtung@ntu.edu.tw) (S.-H. Tung)

<sup>b</sup> Department of Chemical Engineering, National Taiwan University, Taipei 10617, Taiwan.

E-mail: [cchueh@ntu.edu.tw](mailto:cchueh@ntu.edu.tw) (C.-C. Chueh); [chenwc@ntu.edu.tw](mailto:chenwc@ntu.edu.tw) (W.-C. Chen)

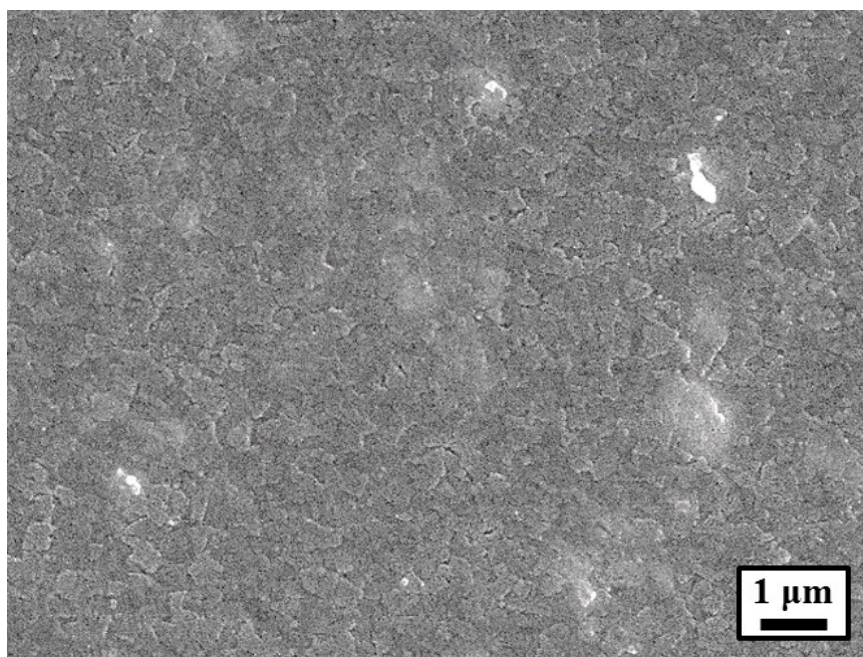

**Figure S1.** The top-view SEM image of the electrodeposited SnO<sub>2</sub> film on an ITO/glass substrate.

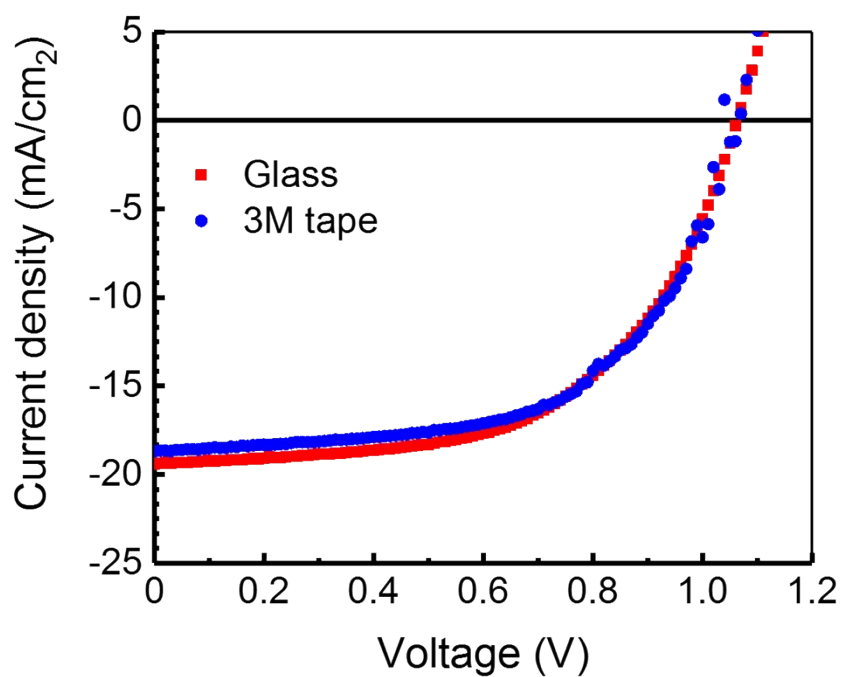

**Figure S2.** The  $J$ - $V$  curves of the studied glass-based PVSCs (using SnO<sub>2</sub> ETL) using glass slide and 3M elastomer as the encapsulating layer.

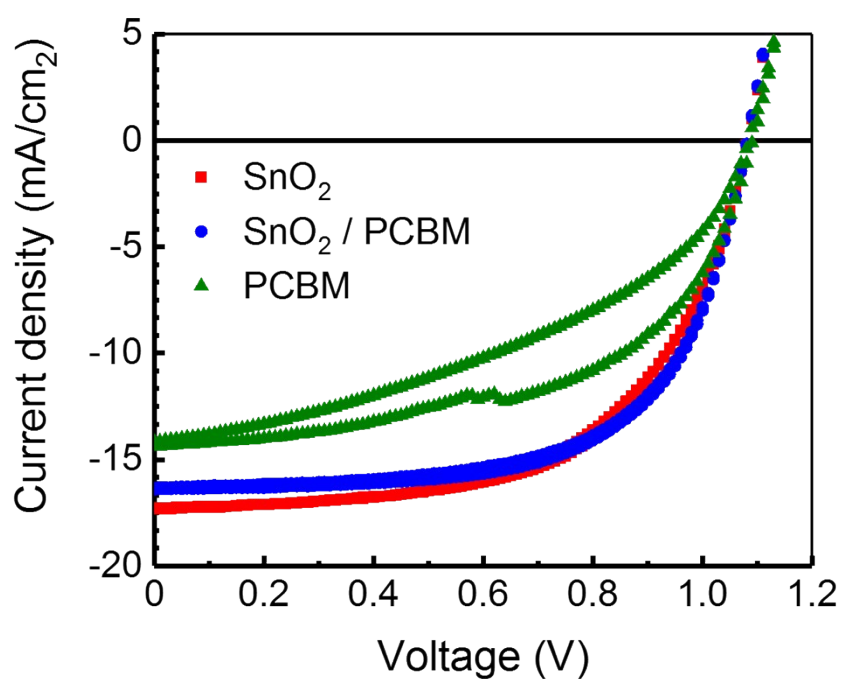

**Figure S3.** The  $J$ - $V$  curves of the studied glass-based PVSCs using neat electrodeposited SnO<sub>2</sub> ETL, SnO<sub>2</sub>/PCBM ETL, and PCBM ETL.

**Table S1.** Device parameters of the studied glass-based PVSCs using neat electrodeposited SnO<sub>2</sub> ETL, SnO<sub>2</sub>/PCBM ETL, and PCBM ETL.

| Electron-transporting layer    |   | V <sub>oc</sub> (V) | J <sub>sc</sub> (mA/cm <sup>2</sup> ) | FF   | PCE (%) |
|--------------------------------|---|---------------------|---------------------------------------|------|---------|
| SnO <sub>2</sub> <sup>a)</sup> | F | 1.08                | -17.27                                | 0.60 | 14.0    |
|                                | R | 1.08                | -17.31                                | 0.58 | 13.6    |
| SnO <sub>2</sub> / PCBM        | F | 1.08                | -16.26                                | 0.63 | 13.9    |
|                                | R | 1.08                | -16.37                                | 0.63 | 14.0    |
| PCBM                           | F | 1.08                | -14.17                                | 0.42 | 8.1     |
|                                | R | 1.09                | -14.37                                | 0.55 | 10.8    |

\* Measured under 0.8 sun illumination

\* F: Forward-bias sweep (-0.1V→1.2V); R: Reverse-bias sweep (1.2V→-0.1V)

a) Time of electrodeposition for SnO<sub>2</sub>: 60s

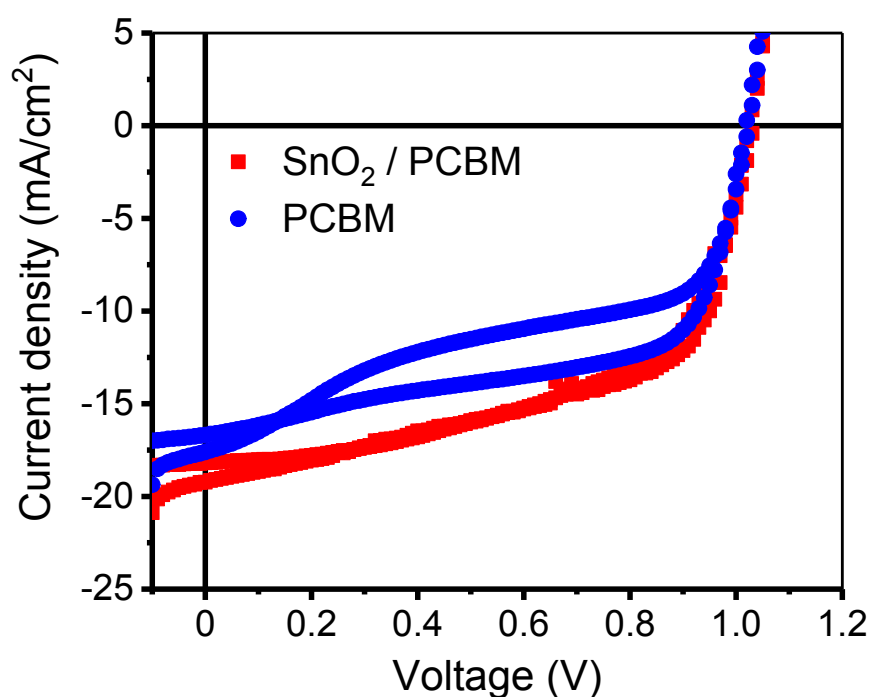

**Figure S4.** The J-V curves of the studied flexible PVSCs using a simplex PCBM ETL and the composite SnO<sub>2</sub>/PCBM ETL at AM 1.5G illumination.

**Table S2.** Device parameters of the studied flexible PVSCs using a simplex PCBM ETL and the composite SnO<sub>2</sub>/PCBM ETL at AM 1.5G illumination\*.

| <b>Electron-transporting layer</b> |          | <b>V<sub>oc</sub><br/>(V)</b> | <b>J<sub>sc</sub><br/>(mA/cm<sup>2</sup>)</b> | <b>FF</b> | <b>PCE<br/>(%)</b> |
|------------------------------------|----------|-------------------------------|-----------------------------------------------|-----------|--------------------|
| <b>SnO<sub>2</sub> / PCBM</b>      | <b>F</b> | 1.03                          | -19.23                                        | 0.56      | 11.1               |
|                                    | <b>R</b> | 1.02                          | -18.19                                        | 0.58      | 10.7               |
| <b>PCBM</b>                        | <b>F</b> | 1.03                          | -17.60                                        | 0.45      | 8.2                |
|                                    | <b>R</b> | 1.02                          | -16.69                                        | 0.60      | 10.2               |

\* Measured under 1.0 sun illumination

\* F: Forward-bias sweep (-0.1V→1.2V); R: Reverse-bias sweep (1.2V→-0.1V)

\* Time of electrodeposition for SnO<sub>2</sub>: 120s
